# Supplementary material for: Imaging of Pseudomonas aeruginosa infection with Ga-68 labelled pyoverdine for positron emission tomography
Source: PubMed Central journal article supplement (PMC6200719; doi:10.1038/s41598-018-33895-w), 2018-10-24
Supplement: 41598_2018_33895_MOESM1_ESM.pdf [file 41598_2018_33895_MOESM1_ESM.pdf]

# **Imaging of *Pseudomonas aeruginosa* infection with Ga-68 labelled pyoverdine for positron emission tomography**

**Milos Petrik<sup>1</sup>, Eva Umlaufova<sup>1</sup>, Vladislav Raclavsky<sup>2</sup>, Andrea Palyzova<sup>3</sup>, Vladimir Havlicek<sup>3,4</sup>, Hubertus Haas<sup>5</sup>, Zbynek Novy<sup>1</sup>, Dalibor Dolezal<sup>1</sup>, Marian Hajduch<sup>1</sup> and Clemens Decristoforo<sup>6</sup>**

<sup>1</sup>Institute of Molecular and Translational Medicine, Faculty of Medicine and Dentistry, Palacky University, Olomouc, Czech Republic

<sup>2</sup>Department of Microbiology, Faculty of Medicine and Dentistry, Palacky University, Olomouc, Czech Republic

<sup>3</sup>Institute of Microbiology of the Czech Academy of Sciences, v.v.i., Prague, Czech Republic

<sup>4</sup>Regional Centre of Advanced Technologies and Materials, Department of Analytical Chemistry, Faculty of Science, Palacky University, Olomouc, Czech Republic

<sup>5</sup>Division of Molecular Biology/Biocenter, Medical University Innsbruck, Innsbruck, Austria

<sup>6</sup>Clinical Department of Nuclear Medicine, Medical University Innsbruck, Innsbruck, Austria

## **Table of contents**

**Supplementary Figure S1:** Quality control of  $^{68}\text{Ga}$ -PVD-PAO1 using high performance liquid chromatography (A) and instant thin-layer chromatography on silica gel impregnated glass fiber sheets (B).

**Supplementary Figure S2:** (A) Biodistribution of  $^{68}\text{Ga}$ -PVD-PAO1 in non-infected Balb/c mice 30 a 90 min after injection. (B) Static PET/CT imaging (3D volume rendered images) of  $^{68}\text{Ga}$ -PVD-PAO1 in non-infected Balb/c mice 30 and 90 min after injection.

**Supplementary Table S1:** *In vitro* characterization of  $^{68}\text{Ga}$ -PVD-PAO1. Log P, protein binding (expressed as % of protein bound activity of the total activity used) and stability in human serum, 0.1 M  $\text{FeCl}_3$  and 6 mM DTPA.

**Supplementary Table S2.** Microbial strains used in the study.

**Supplementary Figure S1:** Quality control of  $^{68}\text{Ga}$ -PVD-PAO1 using high performance liquid chromatography (A) and instant thin-layer chromatography on silica gel impregnated glass fiber sheets (B).

**A**

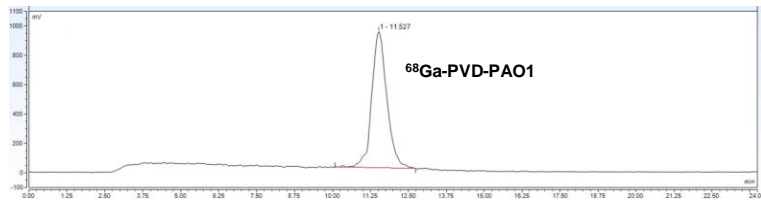

**B**

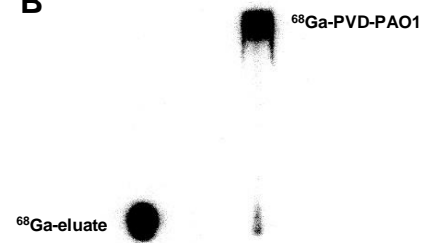

**Supplementary Figure S2:** (A) Biodistribution of  $^{68}\text{Ga}$ -PVD-PAO1 in non-infected Balb/c mice 30 a 90 min after injection. (B) Static PET/CT imaging (3D volume rendered images) of  $^{68}\text{Ga}$ -PVD-PAO1 in non-infected Balb/c mice 30 and 90 min after injection.

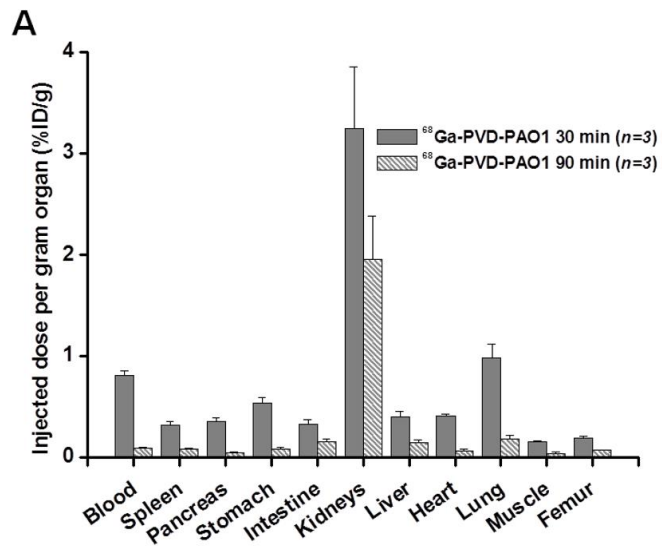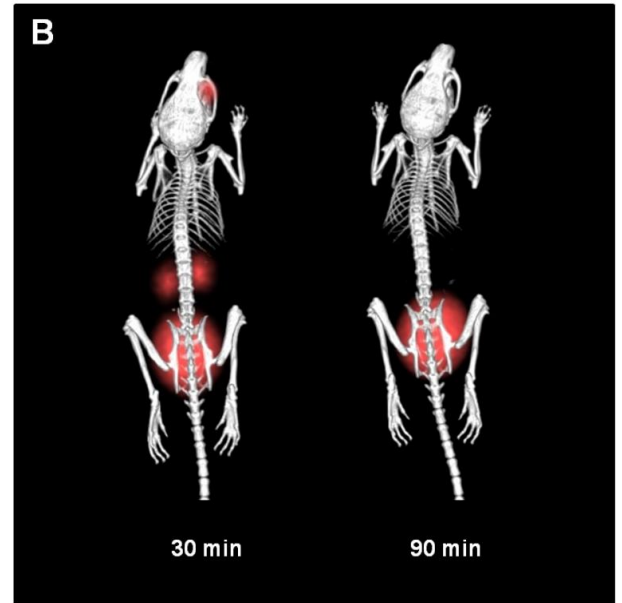

**Supplementary Table S1:** *In vitro* characterization of <sup>68</sup>Ga-PVD-PAO1. Log P, protein binding (expressed as % of protein bound activity of the total activity used) and stability in human serum, 0.1 M FeCl<sub>3</sub> and 6 mM DTPA.

|                              | Log P      | Incubation | Protein   | Stability in | Stability in  | Stability in  |
|------------------------------|------------|------------|-----------|--------------|---------------|---------------|
| <sup>68</sup> Ga-siderophore | (n=6)      | time (min) | binding   | human serum  | iron solution | DTPA solution |
|                              |            |            | (%)       | (%)          | (%)           | (%)           |
|                              |            |            | (n=3)     | (n=3)        | (n=3)         | (n=3)         |
|                              |            | 30         | 2.31±0.93 | 97.9±0.52    | 0.53±0.32     | 94.8±2.21     |
| <sup>68</sup> Ga-PVD-PAO1    | -3.07±0.08 | 60         | 2.79±1.14 | 96.6±1.19    | 0.37±0.21     | 95.7±0.62     |
|                              |            | 120        | 2.46±0.73 | 95.6±2.34    | 0.17±0.09     | 89.7±2.73     |

**Supplementary Table S2.** Microbial strains used in the study.

\*No refers to the Collection of clinical isolates of the Department of Microbiology, Faculty of Medicine & Dentistry, Palacky University Olomouc.

CF – cystic fibrosis; COPD – chronic obstructive pulmonary disease; CRC – colorectal cancer

| Species                             | Isolate No* | Origin                                                       |
|-------------------------------------|-------------|--------------------------------------------------------------|
| <i>Acinetobacter baumannii</i>      | 2377        | sputum of a CF patient                                       |
| <i>Burkholderia cenocepacia</i>     | 2029        | sputum of a CF patient, ST-32 strain                         |
| <i>Burkholderia multivorans</i>     | 1926        | bronchial aspirate from an acute respiratory failure patient |
| <i>Candida albicans</i>             | 1265        | sputum of a CF patient                                       |
| <i>Escherichia coli</i>             | ATCC 10536  | ATCC                                                         |
| <i>Escherichia coli</i>             | 2463        | rectal swab from a patient suffering from haemorrhoids       |
| <i>Klebsiella pneumonia</i>         | 2102        | rectal swab from a CRC patient                               |
| <i>Listeria monocytogenes</i>       | ---         | QC control strain from national authority                    |
| <i>Pseudomonas aeruginosa</i>       | ATCC 15692  | ATCC                                                         |
| <i>Pseudomonas aeruginosa</i>       | 1019        | sputum of a COPD patient                                     |
| <i>Pseudomonas grimontii</i>        | 754         | sputum of a COPD patient                                     |
| <i>Pseudomonas monteilii</i>        | 2260        | rectal swab from a low birth-weight newborn                  |
| <i>Staphylococcus aureus</i>        | 230         | sputum of a CF patient                                       |
| <i>Stenotrophomonas maltophilia</i> | 303         | sputum of a CF patient                                       |
| <i>Streptococcus agalactiae</i>     | 487         | sputum of a CF patient                                       |
| <i>Yersinia enterocolitica</i>      | 2871        | rectal swab from a patient suffering from gallstones         |
